# Supplementary material for: Glucose levels measured with continuous glucose monitoring in uncomplicated pregnancies
Source: PubMed Central journal article supplement — BMJ Open Diabetes Res Care. 2024 May 10;12(3):e003989. doi: 10.1136/bmjdrc-2023-003989 (PMC11097821; doi:10.1136/bmjdrc-2023-003989), 2024-05-10

**Online Supplemental Material**

|                                                                                                       |                                     |
|-------------------------------------------------------------------------------------------------------|-------------------------------------|
| Table of Contents                                                                                     |                                     |
| Study Sites and Personnel.....                                                                        | 2                                   |
| Supplemental Table S1. Eligibility Criteria.....                                                      | 3                                   |
| Supplementary Table S2. Glycemic Profiles of Uncomplicated Pregnancies by 4-Week Periods              | 4                                   |
| Supplementary Table S3. Glycemic Profiles of Uncomplicated Pregnancies by Time of Day .....           | 6                                   |
| Supplementary Table S4. Postprandial Profiles of Uncomplicated Pregnancies by Meal Type ....          | 8                                   |
| Supplementary Table S5. Postprandial Profiles of Uncomplicated Pregnancies by BMI Category .....      | 9                                   |
| Supplemental Table S6. Glycemic Profiles of Uncomplicated Pregnancies by BMI Category ...             | 10                                  |
| Supplementary Figure S1. Boxplots of A) Mean Glucose and B) % Time 63-120 mg/dL by 4-Week Period..... | 11                                  |
| Supplementary Figure S2. Glycemic Profiles of Pregnant vs. Non-Pregnant Adult Women.<br>.....         | <b>Error! Bookmark not defined.</b> |

**Study Sites and Personnel**

Principal Investigator: (PI); Primary Coordinator (PC)

**International Diabetes Center Park Nicollet, St. Louis Park, MN:** Anders Carlson (PI), Richard Bergenstal, Thomas Martens, Sean Dunnigan (PC), Mary Johnson, Katie Krumwiede, Kathy Kleeberger, Wanda Konerza, Aimee Grieme, Alina Punel, LeeAnn Thomas, Dana Gershenoff, Heather Lage, Stephanie Zimmerman, Vera Mikityuk, Connie Jensen, Lindsey Smith, Shannon Krizka, Sarah Norman

**University of Pennsylvania, School of Medicine, Philadelphia, PA:** Celeste Durnwald (PI), Elizabeth Norton (PC), Valerie Riis, Keri Simonette, Kate Sohn, Lucia Muzzarelli, Noor Banihashem Ahmad, Sarah Stupp, Sarthak Bakliwal, Allison Dreier, Fatoumata Barry, Madeline Smith, Emily Long, Anne Mullin, BriarRose Ginn, Elias McComb, LaiQuannah Hasan, Samantha Murphy, Shreya Ganguly, Samara Mason, Alexandra Thompson, Andrea Morley, Abby Coco, Liqwha Ncube

**Jaeb Center for Health Research:** Judy Sibayan, Jessica Rusnak, Zoey Li, Peter Calhoun, Roy Beck

## Supplemental Table S1. Eligibility Criteria

### Inclusion Criteria

- 1) Singleton pregnancy with viability verified by 12 weeks gestation on ultrasound\*
- 2) Maternal age of 18 years and older
- 3) Gestational age up to 16 weeks, 6 days determined on ultrasound\*
- 4) English speaking
- 5) HbA1c <6.5%

### Exclusion Criteria

- 1) Signs of abnormalities in fetal or placental development at first routine prenatal visit/ultrasound
- 2) Planned termination of pregnancy or any indications of miscarriage
- 3) Prior gastric bypass surgery
- 4) Pregravid diabetes (type 1 or type 2)
- 5) Unwillingness/inability to wear Dexcom CGM device
- 6) Unwillingness to attend routine antenatal obstetric appointments
- 7) Use of oral systemic steroids
- 8) Use of any medication intended to lower blood glucose, including insulin and non-insulin therapies, at any point during the pregnancy, up to and including at the time of enrollment.
- 9) Deemed unable to participate for medical reasons identified by their physician

## Supplementary Table S2. Glycemic Profiles of Uncomplicated Pregnancies by 4-Week Periods

## A. Weeks 9 to 24

|                                                                 | Weeks 9-12        | Weeks 13-16       | Weeks 17-20       | Weeks 21-24       |
|-----------------------------------------------------------------|-------------------|-------------------|-------------------|-------------------|
| <b>Number of Participants</b>                                   | 46                | 217               | 351               | 342               |
| <b>Days of CGM Readings</b> <i>median (quartiles)</i>           | 14 (12, 19)       | 20 (15, 24)       | 23 (19, 26)       | 23 (18, 27)       |
| <b>Mean glucose (mg/dL)</b> <i>mean ± SD</i>                    | 104 ± 7           | 102 ± 7           | 99 ± 8            | 97 ± 8            |
| <b>Glucose SD (mg/dL)</b> <i>mean ± SD</i>                      | 18 ± 3            | 18 ± 3            | 18 ± 3            | 18 ± 3            |
| <b>Glucose Coefficient of Variation (%)</b> <i>mean ± SD</i>    | 17% ± 3%          | 18% ± 3%          | 18% ± 3%          | 18% ± 3%          |
| <b>% Time 63-120 mg/dL</b> <i>mean ± SD</i>                     | 83% ± 8%          | 84% ± 7%          | 86% ± 8%          | 86% ± 7%          |
| <i>median (quartiles)</i>                                       | 84% (78%, 86%)    | 85% (80%, 89%)    | 87% (83%, 91%)    | 88% (83%, 92%)    |
| <b>% Time 63-140 mg/dL</b> <i>mean ± SD</i>                     | 94% ± 3%          | 95% ± 3%          | 95% ± 4%          | 95% ± 4%          |
| <i>median (quartiles)</i>                                       | 94% (92%, 97%)    | 96% (94%, 97%)    | 96% (93%, 97%)    | 96% (93%, 98%)    |
| <b>% Time &lt;70 mg/dL</b> <i>median (quartiles)</i>            | 1.7% (0.8%, 3.8%) | 1.8% (0.9%, 4.2%) | 2.8% (1.2%, 6.1%) | 3.5% (1.6%, 7.3%) |
| <b>Area over the curve 70 mg/dL</b> <i>median (quartiles)</i>   | 0.2 (0.1, 0.4)    | 0.2 (0.1, 0.5)    | 0.3 (0.1, 0.6)    | 0.3 (0.1, 0.7)    |
| <b>% Time &lt;63 mg/dL</b> <i>median (quartiles)</i>            | 0.9% (0.3%, 1.9%) | 0.8% (0.3%, 2.1%) | 1.2% (0.4%, 2.6%) | 1.5% (0.7%, 3.2%) |
| <b>Area over the curve 63 mg/dL</b> <i>median (quartiles)</i>   | 0.1 (0.0, 0.2)    | 0.1 (0.0, 0.2)    | 0.1 (0.0, 0.3)    | 0.1 (0.1, 0.3)    |
| <b>% Time &lt;54 mg/dL</b> <i>median (quartiles)</i>            | 0.4% (0.1%, 0.9%) | 0.3% (0.1%, 0.9%) | 0.5% (0.2%, 1.2%) | 0.5% (0.2%, 1.3%) |
| <b>Area over the curve 54 mg/dL</b> <i>median (quartiles)</i>   | 0.0 (0.0, 0.1)    | 0.0 (0.0, 0.1)    | 0.0 (0.0, 0.1)    | 0.0 (0.0, 0.1)    |
| <b>% Time &gt;120 mg/dL</b> <i>median (quartiles)</i>           | 15% (10%, 21%)    | 13% (9%, 18%)     | 10% (6%, 15%)     | 9% (5%, 15%)      |
| <b>Area under the curve 120 mg/dL</b> <i>median (quartiles)</i> | 2.2 (1.3, 3.7)    | 1.7 (1.0, 2.8)    | 1.4 (0.7, 2.2)    | 1.1 (0.6, 2.0)    |
| <b>% Time &gt;140 mg/dL</b> <i>median (quartiles)</i>           | 3.7% (1.8%, 6.6%) | 2.9% (1.4%, 4.9%) | 2.1% (1.0%, 3.8%) | 1.7% (0.8%, 3.5%) |
| <b>Area under the curve 140 mg/dL</b> <i>median (quartiles)</i> | 0.45 (0.18, 0.93) | 0.33 (0.15, 0.65) | 0.22 (0.09, 0.52) | 0.18 (0.07, 0.44) |

## B. Weeks 25 to 40

|                                                              | Weeks 25 to 28 | Weeks 29 to 32 | Weeks 33 to 36 | Weeks 37 to 40 |
|--------------------------------------------------------------|----------------|----------------|----------------|----------------|
| <b>Number of Participants</b>                                | 320            | 305            | 273            | 201            |
| <b>Days of CGM Readings</b> <i>median (quartiles)</i>        | 23 (18, 27)    | 23 (17, 26)    | 22 (17, 26)    | 19 (14, 22)    |
| <b>Mean glucose (mg/dL)</b> <i>mean ± SD</i>                 | 96 ± 8         | 97 ± 8         | 98 ± 9         | 97 ± 9         |
| <b>Glucose SD (mg/dL)</b> <i>mean ± SD</i>                   | 18 ± 3         | 18 ± 3         | 19 ± 3         | 19 ± 4         |
| <b>Glucose Coefficient of Variation (%)</b> <i>mean ± SD</i> | 19% ± 3%       | 19% ± 3%       | 19% ± 3%       | 20% ± 4%       |
| <b>% Time 63-120 mg/dL</b> <i>mean ± SD</i>                  | 86% ± 8%       | 85% ± 8%       | 84% ± 9%       | 83% ± 9%       |
| <i>median (quartiles)</i>                                    | 87% (82%, 91%) | 87% (81%, 91%) | 86% (79%, 90%) | 85% (79%, 90%) |
| <b>% Time 63-140 mg/dL</b> <i>mean ± SD</i>                  | 94% ± 5%       | 94% ± 4%       | 93% ± 6%       | 93% ± 6%       |

|                                                                 |                   |                   |                   |                    |
|-----------------------------------------------------------------|-------------------|-------------------|-------------------|--------------------|
| <i>median (quartiles)</i>                                       | 95% (93%, 97%)    | 95% (93%, 97%)    | 95% (92%, 97%)    | 94% (91%, 97%)     |
| <b>% Time &lt;70 mg/dL</b> <i>median (quartiles)</i>            | 4.4% (2.2%, 9.3%) | 3.9% (1.9%, 8.5%) | 4.5% (1.9%, 8.7%) | 4.5% (1.5%, 11.2%) |
| <b>Area over the curve 70 mg/dL</b> <i>median (quartiles)</i>   | 0.4 (0.2, 0.8)    | 0.4 (0.2, 0.7)    | 0.4 (0.2, 0.8)    | 0.4 (0.1, 1.0)     |
| <b>% Time &lt;63 mg/dL</b> <i>median (quartiles)</i>            | 1.8% (0.8%, 3.8%) | 1.7% (0.7%, 3.6%) | 1.9% (0.7%, 3.6%) | 1.7% (0.6%, 5.5%)  |
| <b>Area over the curve 63 mg/dL</b> <i>median (quartiles)</i>   | 0.2 (0.1, 0.4)    | 0.2 (0.1, 0.3)    | 0.2 (0.1, 0.4)    | 0.1 (0.0, 0.4)     |
| <b>% Time &lt;54 mg/dL</b> <i>median (quartiles)</i>            | 0.6% (0.2%, 1.5%) | 0.6% (0.2%, 1.3%) | 0.6% (0.2%, 1.5%) | 0.5% (0.1%, 1.6%)  |
| <b>Area over the curve 54 mg/dL</b> <i>median (quartiles)</i>   | 0.1 (0.0, 0.1)    | 0.0 (0.0, 0.1)    | 0.1 (0.0, 0.1)    | 0.0 (0.0, 0.1)     |
| <b>% Time &gt;120 mg/dL</b> <i>median (quartiles)</i>           | 9% (5%, 15%)      | 10% (6%, 16%)     | 11% (6%, 18%)     | 11% (6%, 18%)      |
| <b>Area under the curve 120 mg/dL</b> <i>median (quartiles)</i> | 1.2 (0.6, 2.2)    | 1.3 (0.7, 2.4)    | 1.4 (0.7, 2.6)    | 1.5 (0.7, 2.7)     |
| <b>% Time &gt;140 mg/dL</b> <i>median (quartiles)</i>           | 1.7% (0.7%, 3.6%) | 2.1% (0.9%, 3.8%) | 2.2% (0.9%, 4.7%) | 2.2% (0.9%, 4.9%)  |
| <b>Area under the curve 140 mg/dL</b> <i>median (quartiles)</i> | 0.20 (0.07, 0.47) | 0.24 (0.08, 0.49) | 0.21 (0.08, 0.60) | 0.23 (0.09, 0.63)  |

Supplementary Table S3. Glycemic Profiles of Uncomplicated Pregnancies by Time of Day

## A. Daytime (6 AM to &lt;Midnight)

|                                                                 | Entire Gestational Period | 1 <sup>st</sup> Trimester | 2 <sup>nd</sup> Trimester | 3 <sup>rd</sup> Trimester |
|-----------------------------------------------------------------|---------------------------|---------------------------|---------------------------|---------------------------|
| <b>Number of Participants</b>                                   | 413                       | 118                       | 413                       | 355                       |
| <b>Days of CGM Readings</b> <i>median (quartiles)</i>           | 92 (64, 110)              | 14 (10, 19)               | 52 (37, 60)               | 40 (27, 48)               |
| <b>Mean glucose</b> (mg/dL) <i>mean ± SD</i>                    | 99 ± 7                    | 104 ± 7                   | 99 ± 7                    | 98 ± 8                    |
| <b>Glucose SD</b> (mg/dL) <i>mean ± SD</i>                      | 20 ± 3                    | 19 ± 3                    | 19 ± 3                    | 20 ± 3                    |
| <b>Glucose Coefficient of Variation</b> (%) <i>mean ± SD</i>    | 20% ± 3%                  | 18% ± 3%                  | 19% ± 3%                  | 20% ± 3%                  |
| <b>% Time 63-120 mg/dL</b> <i>mean ± SD</i>                     | 83% ± 7%                  | 81% ± 8%                  | 84% ± 7%                  | 83% ± 9%                  |
| <i>median (quartiles)</i>                                       | 85% (80%, 88%)            | 82% (76%, 88%)            | 85% (81%, 89%)            | 84% (78%, 89%)            |
| <b>% Time 63-140 mg/dL</b> <i>mean ± SD</i>                     | 94% ± 3%                  | 94% ± 4%                  | 94% ± 4%                  | 93% ± 5%                  |
| <i>median (quartiles)</i>                                       | 95% (93%, 96%)            | 95% (93%, 96%)            | 95% (93%, 97%)            | 94% (92%, 96%)            |
| <b>% Time &lt;70 mg/dL</b> <i>median (quartiles)</i>            | 3.9% (2.0%, 6.8%)         | 1.6% (0.8%, 3.0%)         | 3.3% (1.7%, 6.5%)         | 4.4% (2.1%, 8.7%)         |
| <b>Area over the curve 70 mg/dL</b> <i>median (quartiles)</i>   | 0.3 (0.2, 0.6)            | 0.2 (0.1, 0.3)            | 0.3 (0.1, 0.6)            | 0.4 (0.2, 0.8)            |
| <b>% Time &lt;63 mg/dL</b> <i>median (quartiles)</i>            | 1.6% (0.8%, 2.9%)         | 0.8% (0.3%, 1.5%)         | 1.3% (0.6%, 2.8%)         | 1.8% (0.8%, 3.6%)         |
| <b>Area over the curve 63 mg/dL</b> <i>median (quartiles)</i>   | 0.1 (0.1, 0.3)            | 0.1 (0.0, 0.2)            | 0.1 (0.1, 0.2)            | 0.1 (0.1, 0.3)            |
| <b>% Time &lt;54 mg/dL</b> <i>median (quartiles)</i>            | 0.6% (0.3%, 1.0%)         | 0.3% (0.1%, 0.7%)         | 0.5% (0.2%, 1.0%)         | 0.6% (0.2%, 1.3%)         |
| <b>Area over the curve 54 mg/dL</b> <i>median (quartiles)</i>   | 0.0 (0.0, 0.1)            | 0.0 (0.0, 0.1)            | 0.0 (0.0, 0.1)            | 0.0 (0.0, 0.1)            |
| <b>% Time &gt;120 mg/dL</b> <i>median (quartiles)</i>           | 13% (8%, 19%)             | 17% (11%, 23%)            | 12% (8%, 18%)             | 13% (7%, 20%)             |
| <b>Area under the curve 120 mg/dL</b> <i>median (quartiles)</i> | 1.8 (1.0, 2.8)            | 2.4 (1.4, 3.4)            | 1.6 (0.9, 2.7)            | 1.6 (0.8, 3.1)            |
| <b>% Time &gt;140 mg/dL</b> <i>median (quartiles)</i>           | 2.9% (1.5%, 4.7%)         | 3.9% (2.0%, 6.3%)         | 2.6% (1.3%, 4.7%)         | 2.5% (1.1%, 5.5%)         |
| <b>Area under the curve 140 mg/dL</b> <i>median (quartiles)</i> | 0.35 (0.15, 0.67)         | 0.49 (0.20, 0.92)         | 0.30 (0.13, 0.63)         | 0.29 (0.11, 0.71)         |

## B. Nighttime (Midnight to &lt;6 AM)

|                                                       | Entire Gestational Period | 1 <sup>st</sup> Trimester | 2 <sup>nd</sup> Trimester | 3 <sup>rd</sup> Trimester |
|-------------------------------------------------------|---------------------------|---------------------------|---------------------------|---------------------------|
| <b>Number of Participants</b>                         | 413                       | 135                       | 413                       | 359                       |
| <b>Days of CGM Readings</b> <i>median (quartiles)</i> | 31 (21, 37)               | 4 (3, 6)                  | 17 (12, 20)               | 13 (9, 16)                |
| <b>Mean glucose</b> (mg/dL) <i>mean ± SD</i>          | 96 ± 8                    | 101 ± 9                   | 96 ± 9                    | 96 ± 10                   |

|                                                          |                   |                   |                   |                   |
|----------------------------------------------------------|-------------------|-------------------|-------------------|-------------------|
| <b>Glucose SD (mg/dL) mean ± SD</b>                      | 16 ± 3            | 14 ± 4            | 15 ± 3            | 16 ± 3            |
| <b>Glucose Coefficient of Variation (%) mean ± SD</b>    | 17% ± 3%          | 14% ± 4%          | 16% ± 3%          | 17% ± 3%          |
| <b>% Time 63-120 mg/dL mean ± SD</b>                     | 89% ± 8%          | 90% ± 11%         | 89% ± 8%          | 87% ± 10%         |
| <i>median (quartiles)</i>                                | 91% (87%, 94%)    | 93% (88%, 96%)    | 92% (86%, 95%)    | 90% (85%, 94%)    |
| <b>% Time 63-140 mg/dL mean ± SD</b>                     | 95% ± 4%          | 97% ± 5%          | 96% ± 4%          | 94% ± 5%          |
| <i>median (quartiles)</i>                                | 96% (94%, 97%)    | 98% (96%, 99%)    | 96% (95%, 98%)    | 95% (93%, 98%)    |
| <b>% Time &lt;70 mg/dL median (quartiles)</b>            | 4.2% (2.0%, 7.6%) | 1.6% (0.4%, 4.2%) | 3.7% (1.8%, 7.2%) | 4.9% (1.9%, 9.3%) |
| <b>Area over the curve 70 mg/dL median (quartiles)</b>   | 0.5 (0.2, 0.9)    | 0.2 (0.0, 0.4)    | 0.4 (0.2, 0.9)    | 0.5 (0.2, 1.1)    |
| <b>% Time &lt;63 mg/dL median (quartiles)</b>            | 2.2% (1.0%, 4.1%) | 0.7% (0.1%, 2.4%) | 2.0% (0.9%, 4.1%) | 2.4% (0.9%, 5.0%) |
| <b>Area over the curve 63 mg/dL median (quartiles)</b>   | 0.3 (0.1, 0.5)    | 0.1 (0.0, 0.2)    | 0.2 (0.1, 0.5)    | 0.2 (0.1, 0.5)    |
| <b>% Time &lt;54 mg/dL median (quartiles)</b>            | 1.1% (0.4%, 2.0%) | 0.2% (0.0%, 0.9%) | 0.9% (0.3%, 2.1%) | 1.0% (0.3%, 2.3%) |
| <b>Area over the curve 54 mg/dL median (quartiles)</b>   | 0.1 (0.0, 0.2)    | 0.0 (0.0, 0.1)    | 0.1 (0.0, 0.2)    | 0.1 (0.0, 0.2)    |
| <b>% Time &gt;120 mg/dL median (quartiles)</b>           | 5% (3%, 11%)      | 5% (2%, 10%)      | 4% (2%, 10%)      | 6% (2%, 12%)      |
| <b>Area under the curve 120 mg/dL median (quartiles)</b> | 0.6 (0.3, 1.3)    | 0.4 (0.2, 1.0)    | 0.5 (0.2, 1.2)    | 0.6 (0.2, 1.4)    |
| <b>% Time &gt;140 mg/dL median (quartiles)</b>           | 0.7% (0.3%, 1.8%) | 0.4% (0.0%, 1.5%) | 0.5% (0.1%, 1.7%) | 0.8% (0.2%, 2.0%) |
| <b>Area under the curve 140 mg/dL median (quartiles)</b> | 0.07 (0.02, 0.23) | 0.02 (0.00, 0.19) | 0.04 (0.00, 0.18) | 0.07 (0.01, 0.25) |

**Supplementary Table S4. Postprandial Profiles of Uncomplicated Pregnancies by Meal Type**

|                                                                             | <b>Breakfast<br/>(3 AM to &lt;11 AM)</b> | <b>Lunch<br/>(11 AM to &lt;4 PM)</b> | <b>Dinner<br/>(4 PM to &lt;3 AM)</b> |
|-----------------------------------------------------------------------------|------------------------------------------|--------------------------------------|--------------------------------------|
| <b>Number of Participants</b>                                               | 148                                      | 156                                  | 157                                  |
| <b>Number of Meals</b>                                                      | 1129                                     | 1120                                 | 1477                                 |
| <b>Fasting glucose</b> <sup>a</sup> (mg/dL) <i>mean ± SD</i>                | 88 ± 14                                  | 87 ± 14                              | 89 ± 14                              |
| <b>Baseline glucose prior to meal</b> <sup>b</sup> (mg/dL) <i>mean ± SD</i> | 87 ± 15                                  | 89 ± 18                              | 94 ± 19                              |
| <b>Postprandial glucose level</b> (mg/dL) <i>mean ± SD</i>                  |                                          |                                      |                                      |
| 30 minutes after meal time                                                  | 102 ± 22                                 | 101 ± 22                             | 105 ± 21                             |
| 1 hour after meal time                                                      | 104 ± 23                                 | 108 ± 23                             | 110 ± 23                             |
| 2 hours after meal time                                                     | 95 ± 19                                  | 103 ± 22                             | 106 ± 21                             |
| 3 hours after meal time                                                     | 89 ± 17                                  | 98 ± 20                              | 103 ± 19                             |
| <b>Postprandial peak glucose</b> (mg/dL) <i>mean ± SD</i>                   | 121 ± 22                                 | 126 ± 23                             | 129 ± 21                             |
| <b>Glucose meal excursion</b> <sup>c</sup> (mg/dL) <i>mean ± SD</i>         | 34 ± 21                                  | 37 ± 23                              | 35 ± 21                              |
| <b>Time to peak glucose</b> (min) <i>median (IQR)</i>                       | 50 (37, 85)                              | 70 (43, 130)                         | 71 (41, 136)                         |
| <b>Rate of Glucose Rise</b> <sup>d</sup> (mg/dL/min) <i>median (IQR)</i>    | 0.6 (0.3, 1.1)                           | 0.5 (0.2, 0.9)                       | 0.5 (0.2, 0.8)                       |

Summary statistics are on a meal-level, with the exception of fasting glucose, which is on a day-level. Postprandial time period is 4 hours after meal start-time. Each period requires participants to have at least 5 meals a) with sufficient CGM data (non-missing glucose -15m, +30m, +1h, +2h, and +3h after meal start) and b) without additional meals 2 hours before or 3 hours after the recorded meal time.

a – Average glucose in the 45 to 15 minutes prior to first recorded meal of the day. First recorded meal of the day must be before noon.

b – Average glucose in the 15 minutes prior to recorded meal time.

c – Postprandial peak glucose minus baseline glucose prior to meal.

d – Glucose meal excursion divided by time to peak glucose.



**Supplementary Table S5. Postprandial Profiles of Uncomplicated Pregnancies by BMI Category**

|                                                                                        | <b>Underweight<br/>(<math>&lt;18.5</math> kg/m<sup>2</sup>)</b> | <b>Normal<br/>(18.5 to <math>&lt;25.0</math><br/>kg/m<sup>2</sup>)</b> | <b>Overweight<br/>(25.0 to <math>&lt;30.0</math><br/>kg/m<sup>2</sup>)</b> | <b>Obese<br/>(<math>\geq 30.0</math> kg/m<sup>2</sup>)</b> |
|----------------------------------------------------------------------------------------|-----------------------------------------------------------------|------------------------------------------------------------------------|----------------------------------------------------------------------------|------------------------------------------------------------|
| <b>Number of Participants</b>                                                          | 4                                                               | 96                                                                     | 38                                                                         | 19                                                         |
| <b>Number of Meals</b>                                                                 | 71                                                              | 2414                                                                   | 842                                                                        | 420                                                        |
| <b>Fasting glucose</b> <sup>a</sup> (mg/dL) <i>mean</i> $\pm$ <i>SD</i>                | 86 $\pm$ 18                                                     | 86 $\pm$ 14                                                            | 89 $\pm$ 13                                                                | 97 $\pm$ 13                                                |
| <b>Baseline glucose prior to meal</b> <sup>b</sup> (mg/dL) <i>mean</i> $\pm$ <i>SD</i> | 90 $\pm$ 17                                                     | 89 $\pm$ 18                                                            | 91 $\pm$ 17                                                                | 97 $\pm$ 17                                                |
| <b>Postprandial glucose level</b> (mg/dL) <i>mean</i> $\pm$ <i>SD</i>                  |                                                                 |                                                                        |                                                                            |                                                            |
| 30 minutes after meal time                                                             | 105 $\pm$ 21                                                    | 101 $\pm$ 21                                                           | 105 $\pm$ 21                                                               | 110 $\pm$ 23                                               |
| 1 hour after meal time                                                                 | 108 $\pm$ 27                                                    | 106 $\pm$ 23                                                           | 110 $\pm$ 22                                                               | 114 $\pm$ 25                                               |
| 2 hours after meal time                                                                | 104 $\pm$ 23                                                    | 100 $\pm$ 21                                                           | 103 $\pm$ 21                                                               | 109 $\pm$ 23                                               |
| 3 hours after meal time                                                                | 96 $\pm$ 20                                                     | 96 $\pm$ 19                                                            | 98 $\pm$ 20                                                                | 103 $\pm$ 21                                               |
| <b>Postprandial peak glucose</b> (mg/dL) <i>mean</i> $\pm$ <i>SD</i>                   | 127 $\pm$ 24                                                    | 124 $\pm$ 22                                                           | 128 $\pm$ 22                                                               | 133 $\pm$ 23                                               |
| <b>Glucose meal excursion</b> <sup>c</sup> (mg/dL) <i>mean</i> $\pm$ <i>SD</i>         | 36 $\pm$ 26                                                     | 35 $\pm$ 22                                                            | 37 $\pm$ 21                                                                | 36 $\pm$ 23                                                |
| <b>Time to peak glucose</b> (min) <i>median (IQR)</i>                                  | 69 (38, 119)                                                    | 62 (40, 123)                                                           | 60 (40, 127)                                                               | 67 (40, 126)                                               |
| <b>Rate of Glucose Rise</b> <sup>d</sup> (mg/dL/min) <i>median (IQR)</i>               | 0.5 (0.2, 0.9)                                                  | 0.5 (0.2, 0.9)                                                         | 0.5 (0.3, 1.0)                                                             | 0.5 (0.2, 0.9)                                             |

Summary statistics are on a meal-level, with the exception of fasting glucose, which is on a day-level. Postprandial time period is 4 hours after meal start-time. Each period requires participants to have at least 5 meals a) with sufficient CGM data (non-missing glucose -15m, +30m, +1h, +2h, and +3h after meal start) and b) without additional meals 2 hours before or 3 hours after the recorded meal time.

a – Average glucose in the 45 to 15 minutes prior to first recorded meal of the day. First recorded meal of the day must be before noon.

b – Average glucose in the 15 minutes prior to recorded meal time.

c – Postprandial peak glucose minus baseline glucose prior to meal.

d – Glucose meal excursion divided by time to peak glucose.

Supplemental Table S6. Glycemic Profiles of Uncomplicated Pregnancies by BMI Category

|                                                                | Underweight<br>( $<18.5 \text{ kg/m}^2$ ) | Normal<br>( $18.5 \text{ to } <25.0 \text{ kg/m}^2$ ) | Overweight<br>( $25.0 \text{ to } <30.0 \text{ kg/m}^2$ ) | Obese<br>( $\geq 30.0 \text{ kg/m}^2$ ) |
|----------------------------------------------------------------|-------------------------------------------|-------------------------------------------------------|-----------------------------------------------------------|-----------------------------------------|
| <b>Number of Participants</b>                                  | 10                                        | 241                                                   | 94                                                        | 68                                      |
| <b>Days of CGM Readings</b> median (quartiles)                 | 116 (57, 150)                             | 126 (87, 147)                                         | 118 (86, 151)                                             | 123 (78, 145)                           |
| <b>Mean glucose</b> (mg/dL) mean $\pm$ SD                      | 96 $\pm$ 6                                | 96 $\pm$ 7                                            | 100 $\pm$ 6                                               | 103 $\pm$ 6                             |
| <b>Glucose SD</b> (mg/dL) mean $\pm$ SD                        | 21 $\pm$ 2                                | 19 $\pm$ 3                                            | 19 $\pm$ 2                                                | 19 $\pm$ 2                              |
| <b>Glucose Coefficient of Variation</b> (%) mean $\pm$ SD      | 22% $\pm$ 3%                              | 19% $\pm$ 3%                                          | 19% $\pm$ 2%                                              | 19% $\pm$ 2%                            |
| <b>% Time 63-120 mg/dL</b> mean $\pm$ SD                       | 83% $\pm$ 4%                              | 86% $\pm$ 6%                                          | 84% $\pm$ 6%                                              | 81% $\pm$ 9%                            |
| median (quartiles)                                             | 82% (80%, 84%)                            | 87% (84%, 90%)                                        | 85% (81%, 89%)                                            | 83% (74%, 87%)                          |
| <b>% Time 63-140 mg/dL</b> mean $\pm$ SD                       | 92% $\pm$ 3%                              | 94% $\pm$ 3%                                          | 95% $\pm$ 3%                                              | 94% $\pm$ 3%                            |
| median (quartiles)                                             | 92% (90%, 94%)                            | 95% (93%, 96%)                                        | 95% (93%, 96%)                                            | 95% (92%, 96%)                          |
| <b>% Time &lt;70 mg/dL</b> median (quartiles)                  | 8.9% (4.2%, 13.4%)                        | 5.0% (2.8%, 8.1%)                                     | 3.4% (1.7%, 5.5%)                                         | 2.3% (1.5%, 4.0%)                       |
| <b>Area over the curve 70 mg/dL</b> median (quartiles)         | 0.9 (0.5, 1.6)                            | 0.5 (0.3, 0.8)                                        | 0.3 (0.2, 0.6)                                            | 0.2 (0.1, 0.4)                          |
| <b>% Time &lt;63 mg/dL</b> median (quartiles)                  | 4.4% (2.1%, 7.5%)                         | 2.3% (1.2%, 3.8%)                                     | 1.4% (0.7%, 2.6%)                                         | 1.1% (0.7%, 1.7%)                       |
| <b>Area over the curve 63 mg/dL</b> median (quartiles)         | 0.4 (0.2, 0.8)                            | 0.2 (0.1, 0.4)                                        | 0.1 (0.1, 0.3)                                            | 0.1 (0.1, 0.2)                          |
| <b>% Time &lt;54 mg/dL</b> median (quartiles)                  | 1.7% (0.8%, 3.5%)                         | 0.9% (0.4%, 1.5%)                                     | 0.6% (0.3%, 1.1%)                                         | 0.5% (0.3%, 0.8%)                       |
| <b>Area over the curve 54 mg/dL</b> median (quartiles)         | 0.1 (0.1, 0.3)                            | 0.1 (0.0, 0.1)                                        | 0.1 (0.0, 0.1)                                            | 0.0 (0.0, 0.1)                          |
| <b>% Time &gt;120 mg/dL</b> median (quartiles)                 | 10% (8%, 18%)                             | 10% (6%, 14%)                                         | 12% (9%, 18%)                                             | 15% (11%, 24%)                          |
| <b>Area under the curve 120 mg/dL</b> median (quartiles)       | 1.7 (1.2, 2.8)                            | 1.3 (0.7, 2.0)                                        | 1.7 (1.0, 2.6)                                            | 2.1 (1.5, 3.9)                          |
| <b>% Time &gt;140 mg/dL</b> median (quartiles)                 | 3.1% (1.8%, 5.1%)                         | 2.1% (1.0%, 3.4%)                                     | 2.7% (1.5%, 4.3%)                                         | 3.5% (2.3%, 6.5%)                       |
| <b>Area under the curve 140 mg/dL</b> median (quartiles)       | 0.46 (0.22, 0.79)                         | 0.25 (0.10, 0.47)                                     | 0.30 (0.14, 0.60)                                         | 0.43 (0.27, 0.93)                       |
| <b>Morning glucose</b>                                         |                                           |                                                       |                                                           |                                         |
| <b>Mean glucose at 5 AM</b> <sup>a</sup> (mg/dL) mean $\pm$ SD | 86 $\pm$ 6                                | 91 $\pm$ 7                                            | 95 $\pm$ 8                                                | 101 $\pm$ 8                             |
| <b>Glucose SD at 5 AM</b> <sup>a</sup> (mg/dL) mean $\pm$ SD   | 15 $\pm$ 2                                | 14 $\pm$ 3                                            | 14 $\pm$ 3                                                | 14 $\pm$ 3                              |
| <b>Mean glucose at 6 AM</b> <sup>b</sup> (mg/dL) mean $\pm$ SD | 86 $\pm$ 6                                | 90 $\pm$ 7                                            | 94 $\pm$ 7                                                | 101 $\pm$ 7                             |
| <b>Glucose SD at 6 AM</b> <sup>b</sup> (mg/dL) mean $\pm$ SD   | 14 $\pm$ 3                                | 13 $\pm$ 3                                            | 13 $\pm$ 3                                                | 14 $\pm$ 4                              |

a – Includes CGM data from 4:45 to 5:15 AM.

b – Includes CGM data from 5:45 to 6:15 AM.

**Supplementary Figure S1. Boxplots of A) Mean Glucose and B) % Time 63-120 mg/dL by 4-Week Period**

**Figure Legend/Description.** Boxplots of A) mean glucose and B) % time 63-120 mg/dL by 4-week gestational period. Numbers at the top of the boxes represent the number of participants. Whiskers represent the 10<sup>th</sup> and 90<sup>th</sup> percentiles; bottom and top of the shaded boxes represent the 25<sup>th</sup> and 75<sup>th</sup> percentiles, respectively. Dots and solid lines in the middle of the shaded boxes represent the means and medians, respectively.

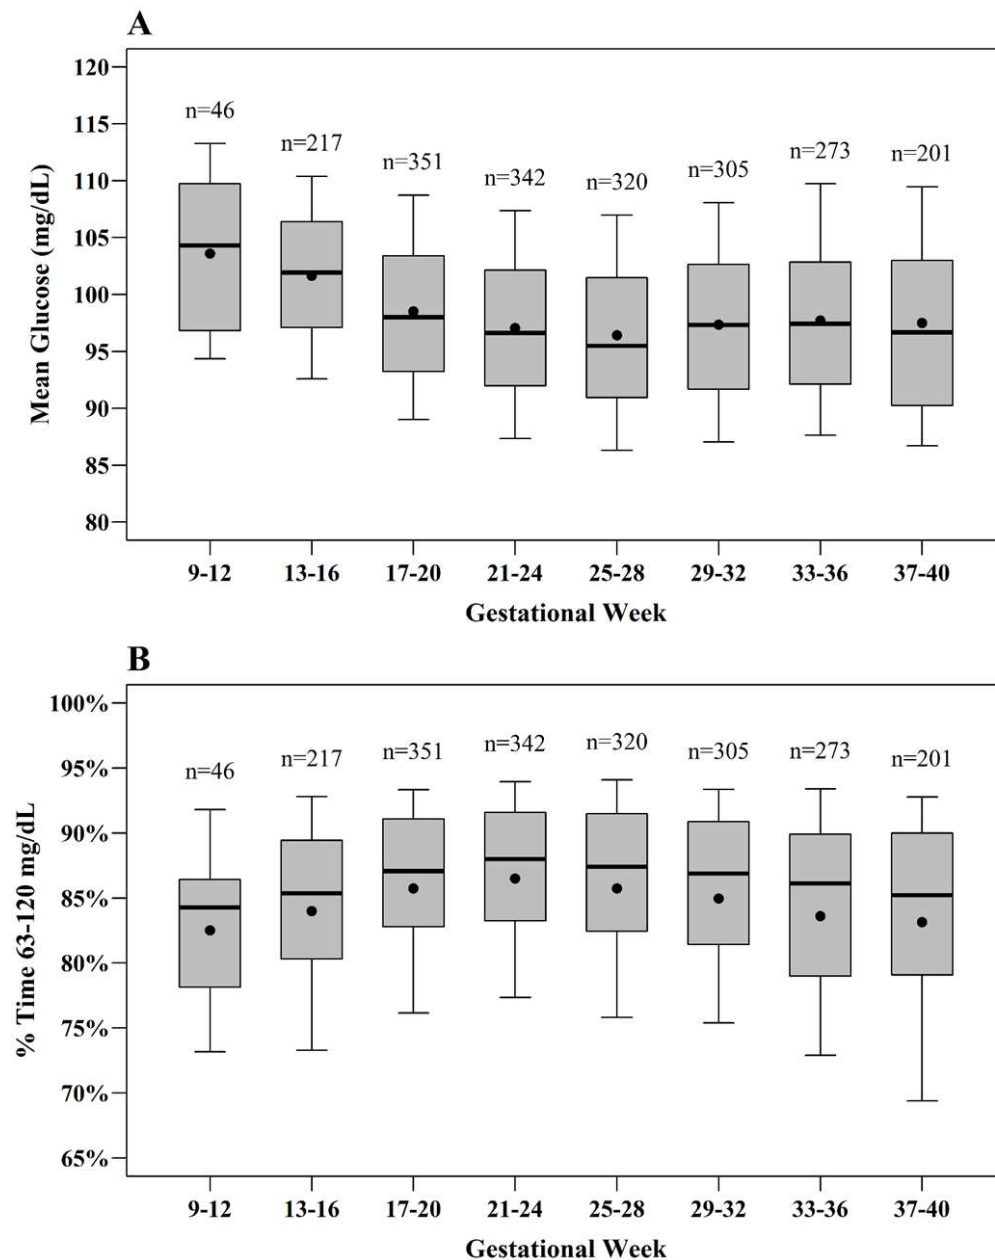

Supplement: bmjdrc-2023-003989supp001.pdf [file bmjdrc-2023-003989supp001.pdf]
